# Supplementary material
Source: PubMed Central journal article supplement (PMC5832713)
Supplement: rspb20172823supp1.pdf [file rspb20172823supp1.pdf]

**Supplementary Material****Meta-analysis reveals weak associations between intrinsic state and personality**

Petri T. Niemelä &amp; Niels J. Dingemans

**Glossary:**

|                        |         |
|------------------------|---------|
| Supplementary Text S1  | Page 2  |
| Supplementary Table 1  | Page 3  |
| Supplementary Table 2  | Page 9  |
| Supplementary Table 3  | Page 9  |
| Supplementary Figure 1 | Page 10 |
| Supplementary Figure 2 | Page 11 |
| Supplementary Text S2  | Page 12 |
| Supplementary Figure 3 | Page 13 |
| Supplementary Table 4  | Page 15 |
| References             | Page 18 |

**Supplementary text S1.** Search terms used in our Web Of Science and Scopus searches.

("behavio\* syndrome" AND "body size") OR ("pace-of-life" AND "body size") OR ("pace of life" AND "body size") OR ("coping style" AND "body size") OR ("animal personalit\*" AND "body size") OR ("animal personalit\*" AND "mass") OR ("coping style" AND "mass") OR ("behavio\* syndrome" AND "mass") OR ("pace-of-life" AND "mass") OR ("pace of life" AND "mass") OR ("animal personalit\*" AND "weight") OR ("coping style" AND "weigh") OR ("behavio\* syndrome" AND "weigh") OR ("pace of life" AND "weight") OR ("pace-of-life" AND "weight") OR ("behavio\* syndrome" AND "cortisol") OR ("pace-of-life" AND " cortisol ") OR ("pace of life" AND "cortisol") OR ("pace of life" AND "cortisol ") OR ("coping style" AND "cortisol") OR ("animal personalit\*" AND "cortisol") OR ("behavio\* syndrome" AND "testosterone") OR ("behavio\* syndrome" AND "corticosterone") OR ("pace-of-life" AND "corticosterone") OR ("pace-of-life" AND "testosterone") OR ("pace of life" AND "corticosterone") OR ("pace of life" AND "testosterone") OR ("coping style" AND "testosterone") OR ("coping style" AND "corticosterone") OR ("animal personalit\*" AND "corticosterone") OR ("animal personalit\*" AND "testosterone") OR ("animal personalit\*" AND "hormon\*") OR ("coping style" AND "hormon\*") OR ("behavio\* syndrome" AND "hormon\*") OR ("pace of life" AND "hormon\*") OR ("pace-of-life" AND "hormon\*") OR ("animal personalit\*" AND "metabolic rate") OR ("coping style" AND "metabolic rate") OR ("behavio\* syndrome" AND "metabolic rate") OR ("pace of life" AND "metabolic rate") OR ("pace-of-life" AND "metabolic rate").

**Supplementary Table 1.** Estimates of among-individual correlations used for our meta-analysis, grouped by the type of intrinsic state variable: (a) body mass, b) body size, c) hormones and d) metabolic rate). For each estimate, we print an abbreviated reference to the study, the study species (English followed by Latin name), the type of behaviour assayed, the type of state variable (“Moderator” variable), the correlation coefficient, and its statistical error (Standard error, SE, or 95% confidence/credible interval, 95% CI). Correlation coefficients that were multiplied by -1 (see Main Text) are highlighted in bold-face. SMR = standard metabolic rate, RMR = resting metabolic rate, PeakMR = peak metabolic rate, DEE = daily energy expenditure, CORT = corticosterone.

| Study                     | Species                                           | Behaviour         | Moderator | <i>r</i> | Error (SE or 95%CI) |
|---------------------------|---------------------------------------------------|-------------------|-----------|----------|---------------------|
| <b>a)</b>                 |                                                   |                   |           |          |                     |
| [1]                       | Southern field cricket <i>Gryllus bimaculatus</i> | Exploration       | Body mass | -0.310   | 0.150               |
| [1]                       | Southern field cricket <i>Gryllus bimaculatus</i> | Aggression        | Body mass | 0.250    | 0.150               |
| [1]                       | Southern field cricket <i>Gryllus bimaculatus</i> | Mating behaviour  | Body mass | -0.150   | 0.150               |
| Han et al. Unpublished I  | Southern field cricket <i>Gryllus bimaculatus</i> | Aggression        | Body mass | 0.465    | 0.067               |
| Han et al. Unpublished I  | Southern field cricket <i>Gryllus bimaculatus</i> | Aggression        | Body mass | 0.153    | 0.101               |
| Han et al. Unpublished I  | Southern field cricket <i>Gryllus bimaculatus</i> | Exploration       | Body mass | -0.172   | 0.059               |
| Han et al. Unpublished I  | Southern field cricket <i>Gryllus bimaculatus</i> | Exploration       | Body mass | 0.019    | 0.073               |
| Han et al. Unpublished II | Southern field cricket <i>Gryllus bimaculatus</i> | Aggression        | Body mass | 0.233    | 0.088               |
| Han et al. Unpublished II | Southern field cricket <i>Gryllus bimaculatus</i> | Aggression        | Body mass | 0.132    | 0.11                |
| Han et al. Unpublished II | Southern field cricket <i>Gryllus bimaculatus</i> | Exploration       | Body mass | -0.111   | 0.057               |
| Han et al. Unpublished II | Southern field cricket <i>Gryllus bimaculatus</i> | Exploration       | Body mass | -0.112   | 0.068               |
| [2]                       | Canary <i>Serinus canaria</i>                     | Song repertoire   | Body mass | 0.100    | 0.160               |
| [2]                       | Canary <i>Serinus canaria</i>                     | Song activity     | Body mass | -0.040   | 0.160               |
| [2]                       | Canary <i>Serinus canaria</i>                     | Song consistency  | Body mass | -0.280   | 0.160               |
| [2]                       | Canary <i>Serinus canaria</i>                     | Mate provisioning | Body mass | 0.060    | 0.160               |
| [2]                       | Canary <i>Serinus canaria</i>                     | Provisioning rate | Body mass | -0.330   | 0.150               |
| [2]                       | Canary <i>Serinus canaria</i>                     | Provisioning rate | Body mass | -0.360   | 0.160               |

|                            |                                                         |                          |           |               |            |
|----------------------------|---------------------------------------------------------|--------------------------|-----------|---------------|------------|
| [3]                        | Southern corroboree frog <i>Pseudophryne corroboree</i> | Activity                 | Body mass | -0.010        | 0.307      |
| [3]                        | Southern corroboree frog <i>Pseudophryne corroboree</i> | Exploration              | Body mass | 0.640         | 0.153      |
| [3]                        | Southern corroboree frog <i>Pseudophryne corroboree</i> | Boldness                 | Body mass | <b>0.320</b>  | 0.264      |
| Moiron et al. Unpublished  | Great tit <i>Parus major</i>                            | Aggression               | Body mass | -0.12         | 0.102      |
| Moiron et al. Unpublished  | Great tit <i>Parus major</i>                            | Exploration              | Body mass | -0.02         | 0.071      |
| Niemela et al. Unpublished | Southern field cricket <i>Gryllus bimaculatus</i>       | Exploration              | Body mass | -0.19         | 0.080      |
| [4]                        | House cricket <i>Acheta domesticus</i>                  | Activity                 | Body mass | 0.220         | -0.07,0.58 |
| [4]                        | House cricket <i>Acheta domesticus</i>                  | Activity                 | Body mass | 0.250         | -0.02,0.56 |
| [4]                        | House cricket <i>Acheta domesticus</i>                  | Response to predator cue | Body mass | 0.01          | -0.41,0.33 |
| [4]                        | House cricket <i>Acheta domesticus</i>                  | Response to predator cue | Body mass | 0.39          | 0.02,0.62  |
| [5]                        | House cricket <i>Acheta domesticus</i>                  | Activity                 | Body mass | 0.16          | -0.26,0.51 |
| [5]                        | House cricket <i>Acheta domesticus</i>                  | Exploration              | Body mass | 0.13          | -0.24,0.52 |
| [6]                        | Green swordtail <i>Xiphophorus helleri</i>              | Aggression               | Body mass | 0.015         | 0.284      |
| [6]                        | Green swordtail <i>Xiphophorus helleri</i>              | Aggression               | Body mass | 0.238         | 0.216      |
| [6]                        | Green swordtail <i>Xiphophorus helleri</i>              | Aggression               | Body mass | -0.746        | 0.257      |
| [6]                        | Green swordtail <i>Xiphophorus helleri</i>              | Aggression               | Body mass | 0.428         | 0.214      |
| [6]                        | Green swordtail <i>Xiphophorus helleri</i>              | Aggression               | Body mass | 0.244         | 0.298      |
| [6]                        | Green swordtail <i>Xiphophorus helleri</i>              | Aggression               | Body mass | 0.609         | 0.232      |
| [6]                        | Green swordtail <i>Xiphophorus helleri</i>              | Aggression               | Body mass | -0.210        | 0.290      |
| [6]                        | Green swordtail <i>Xiphophorus helleri</i>              | Aggression               | Body mass | 0.562         | 0.190      |
| [6]                        | Green swordtail <i>Xiphophorus helleri</i>              | Aggression               | Body mass | <b>0.287</b>  | 0.280      |
| [6]                        | Green swordtail <i>Xiphophorus helleri</i>              | Aggression               | Body mass | <b>-0.645</b> | 0.268      |
| [7]                        | Sheepshead swordtail <i>Xiphophorus birchmanni</i>      | Aggression               | Body mass | 0.741         | 0.151      |
| [7]                        | Sheepshead swordtail <i>Xiphophorus birchmanni</i>      | Aggression               | Body mass | 0.479         | 0.256      |
| [7]                        | Sheepshead swordtail <i>Xiphophorus birchmanni</i>      | Aggression               | Body mass | 0.436         | 0.290      |
| [7]                        | Sheepshead swordtail <i>Xiphophorus birchmanni</i>      | Aggression               | Body mass | 0.508         | 0.229      |
| [7]                        | Sheepshead swordtail <i>Xiphophorus birchmanni</i>      | Aggression               | Body mass | 0.667         | 0.179      |
| [7]                        | Sheepshead swordtail <i>Xiphophorus birchmanni</i>      | Aggression               | Body mass | <b>0.721</b>  | 0.413      |
| [7]                        | Sheepshead swordtail <i>Xiphophorus birchmanni</i>      | Aggression               | Body mass | 0.967         | 0.178      |
| [7]                        | Sheepshead swordtail <i>Xiphophorus birchmanni</i>      | Dominance                | Body mass | 0.480         | 0.276      |
| [7]                        | Sheepshead swordtail <i>Xiphophorus birchmanni</i>      | Dominance                | Body mass | 0.004         | 0.334      |

|                           |                                                         |             |             |               |             |
|---------------------------|---------------------------------------------------------|-------------|-------------|---------------|-------------|
| [8]                       | Red Knot <i>Calidris canutus</i>                        | Exploration | Body mass   | -0.840        | -0.96,-0.45 |
| [9]*                      | Brazilian guinea pig <i>Cavia aperea</i>                | Boldness    | Body mass   | <b>-0.082</b> | 0.299       |
| [9]*                      | Brazilian guinea pig <i>Cavia aperea</i>                | Exploration | Body mass   | <b>-0.353</b> | 0.23        |
| [9]*                      | Brazilian guinea pig <i>Cavia aperea</i>                | Exploration | Body mass   | 0.019         | 0.385       |
| [10]                      | European field cricket <i>Gryllus campestris</i>        | Aggression  | Body mass   | 0.43          | 0.16        |
| [10]                      | European field cricket <i>Gryllus campestris</i>        | Exploration | Body mass   | 0.22          | 0.14        |
| [10]                      | European field cricket <i>Gryllus campestris</i>        | Activity    | Body mass   | 0.17          | 0.15        |
| Krams et al. Unpublished* | Western Stutter-trilling Cricket <i>Gryllus integer</i> | Boldness    | Body mass   | <b>0.102</b>  | 0.086       |
| Krams et al. Unpublished* | Western Stutter-trilling Cricket <i>Gryllus integer</i> | Exploration | Body mass   | <b>-0.084</b> | 0.087       |
| <b>b)</b>                 |                                                         |             |             |               |             |
| [11]*                     | <i>Barnacle goose Branta leucopsis</i>                  | Activity    | Tarsus      | -0.068        | 0.51        |
| [11]*                     | <i>Barnacle goose Branta leucopsis</i>                  | Activity    | Head        | -0.113        | 0.506       |
| [11]*                     | <i>Barnacle goose Branta leucopsis</i>                  | Activity    | Wing        | -0.559        | 0.274       |
| [11]*                     | <i>Barnacle goose Branta leucopsis</i>                  | Boldness    | Tarsus      | -0.096        | 0.384       |
| [11]*                     | <i>Barnacle goose Branta leucopsis</i>                  | Boldness    | Head        | 0.323         | 0.346       |
| [11]*                     | <i>Barnacle goose Branta leucopsis</i>                  | Boldness    | Wing        | -0.059        | 0.386       |
| Moiron et al. Unpublished | Great tit <i>Parus major</i>                            | Exploration | Wing        | -0.01         | -0.10,0.08  |
| Moiron et al. Unpublished | Great tit <i>Parus major</i>                            | Exploration | Bill        | -0.07         | -0.16,0.03  |
| Moiron et al. Unpublished | Great tit <i>Parus major</i>                            | Exploration | Tarsus      | -0.06         | -0.17,0.03  |
| Moiron et al. Unpublished | Great tit <i>Parus major</i>                            | Aggression  | Wing        | -0.11         | -0.22,0.00  |
| Moiron et al. Unpublished | Great tit <i>Parus major</i>                            | Aggression  | Bill        | 0.01          | -0.11,0.11  |
| Moiron et al. Unpublished | Great tit <i>Parus major</i>                            | Aggression  | Tarsus      | -0.08         | -0.20,0.03  |
| [12]                      | Guppy <i>Poecilia reticulata</i>                        | Boldness    | Body length | <b>-0.436</b> | 0.231       |
| [12]                      | Guppy <i>Poecilia reticulata</i>                        | Boldness    | Body length | 0.324         | 0.224       |
| [12]                      | Guppy <i>Poecilia reticulata</i>                        | Boldness    | Body length | 0.315         | 0.238       |
| [12]                      | Guppy <i>Poecilia reticulata</i>                        | Boldness    | Body length | 0.2           | 0.225       |
| [12]                      | Guppy <i>Poecilia reticulata</i>                        | Boldness    | Body length | -0.091        | 0.242       |
| [12]                      | Guppy <i>Poecilia reticulata</i>                        | Boldness    | Body length | 0.383         | 0.187       |
| [13]                      | Blue tit <i>Cyanistes caeruleus</i>                     | Activity    | Tarsus      | 0.1           | 0.084       |
| [13]                      | Blue tit <i>Cyanistes caeruleus</i>                     | Aggression  | Tarsus      | -0.031        | 0.068       |
| [14]                      | Southern field cricket <i>Gryllus bimaculatus</i>       | Exploration | Femur       | -0.13         | 0.04        |

|           |                                                       |                        |                  |               |              |
|-----------|-------------------------------------------------------|------------------------|------------------|---------------|--------------|
| [14]      | Southern field cricket <i>Gryllus bimaculatus</i>     | Aggression             | Femur            | 0.30          | 0.06         |
| [6]       | Green swordtail <i>Xiphophorus helleri</i>            | Aggression             | Body length      | -0.068        | 0.282        |
| [6]       | Green swordtail <i>Xiphophorus helleri</i>            | Aggression             | Body length      | 0.209         | 0.217        |
| [6]       | Green swordtail <i>Xiphophorus helleri</i>            | Aggression             | Body length      | -0.824        | 0.247        |
| [6]       | Green swordtail <i>Xiphophorus helleri</i>            | Aggression             | Body length      | 0.298         | 0.231        |
| [6]       | Green swordtail <i>Xiphophorus helleri</i>            | Aggression             | Body length      | -0.017        | 0.305        |
| [6]       | Green swordtail <i>Xiphophorus helleri</i>            | Aggression             | Body length      | 0.388         | 0.261        |
| [6]       | Green swordtail <i>Xiphophorus helleri</i>            | Aggression             | Body length      | -0.365        | 0.278        |
| [6]       | Green swordtail <i>Xiphophorus helleri</i>            | Aggression             | Body length      | 0.432         | 0.212        |
| [6]       | Green swordtail <i>Xiphophorus helleri</i>            | Aggression             | Body length      | <b>0.467</b>  | 0.264        |
| [6]       | Green swordtail <i>Xiphophorus helleri</i>            | Aggression             | Body length      | <b>-0.62</b>  | 0.264        |
| [2]       | Canary <i>Serinus canaria</i>                         | Repertoire             | Tarsus           | -0.18         | 0.16         |
| [2]       | Canary <i>Serinus canaria</i>                         | Song activity          | Tarsus           | 0.37          | 0.15         |
| [2]       | Canary <i>Serinus canaria</i>                         | Song consistency       | Tarsus           | -0.23         | 0.17         |
| [2]       | Canary <i>Serinus canaria</i>                         | Offspring provisioning | Tarsus           | -0.05         | 0.17         |
| [2]       | Canary <i>Serinus canaria</i>                         | mate provisioning      | Tarsus           | 0.18          | 0.17         |
| <b>c)</b> |                                                       |                        |                  |               | -            |
| [15]      | Sheepshead swordtail <i>Xiphophorus birchmanni</i>    | Activity               | CORT (stress)    | 0.785         | 0.391        |
| [15]      | Sheepshead swordtail <i>Xiphophorus birchmanni</i>    | Activity               | Ketotestosterone | 0.383         | 0.350        |
| [16]      | Belding's ground squirrel <i>Uroditellus beldingi</i> | Exploration            | CORT (stress)    | -0.207        | -0.569,0.45  |
| [16]      | Belding's ground squirrel <i>Uroditellus beldingi</i> | Activity               | CORT (stress)    | -0.028        | -0.421,0.608 |
| [16]      | Belding's ground squirrel <i>Uroditellus beldingi</i> | Docility               | CORT (stress)    | <b>-0.095</b> | -0.388,0.554 |
| [17]      | Alpine marmot <i>Marmota marmota</i>                  | Activity               | CORT (stress)    | 0.040         | -0.56,0.71   |
| [17]      | Alpine marmot <i>Marmota marmota</i>                  | Impulsivity            | CORT (stress)    | 0.080         | -0.68,0.62   |
| [17]      | Alpine marmot <i>Marmota marmota</i>                  | Docility               | CORT (stress)    | <b>-0.140</b> | -0.64,0.63   |
| [2]       | Canary <i>Serinus canaria</i>                         | Song repertoire        | Testosterone     | 0.59          | 0.160        |
| [2]       | Canary <i>Serinus canaria</i>                         | Song activity          | Testosterone     | 0.34          | 0.150        |
| [2]       | Canary <i>Serinus canaria</i>                         | Song consistency       | Testosterone     | 0.25          | 0.160        |
| [2]       | Canary <i>Serinus canaria</i>                         | Mate provisioning      | Testosterone     | 0.04          | 0.150        |
| [2]       | Canary <i>Serinus canaria</i>                         | Provisioning rate      | Testosterone     | -0.14         | 0.150        |
| [2]       | Canary <i>Serinus canaria</i>                         | Provisioning rate      | Testosterone     | -0.06         | 0.160        |

|           |                                                           |              |                 |               |               |
|-----------|-----------------------------------------------------------|--------------|-----------------|---------------|---------------|
| [18]*     | House sparrow <i>Passer domesticus</i>                    | Exploration  | Testosterone    | 0.005         | 0.762         |
| [9]*      | Brazilian guinea pig <i>Cavia aperea</i>                  | Boldness     | CORT (baseline) | <b>-0.062</b> | 0.286         |
| [9]*      | Brazilian guinea pig <i>Cavia aperea</i>                  | Exploration  | CORT (baseline) | <b>-0.767</b> | 0.193         |
| [9]*      | Brazilian guinea pig <i>Cavia aperea</i>                  | Exploration  | CORT (baseline) | -0.439        | 0.422         |
| [19]*     | Brazilian guinea pig <i>Cavia aperea</i>                  | Boldness     | CORT (baseline) | -0.126        | 0.573         |
| [19]*     | Brazilian guinea pig <i>Cavia aperea</i>                  | Boldness     | CORT (stress)   | 0.46          | 0.352         |
| [19]*     | Brazilian guinea pig <i>Cavia aperea</i>                  | Boldness     | CORT (baseline) | <b>0.53</b>   | 0.411         |
| [19]*     | Brazilian guinea pig <i>Cavia aperea</i>                  | Boldness     | CORT (stress)   | <b>0.31</b>   | 0.227         |
| [19]*     | Brazilian guinea pig <i>Cavia aperea</i>                  | Exploration  | CORT (baseline) | 0.231         | 0.361         |
| [19]*     | Brazilian guinea pig <i>Cavia aperea</i>                  | Exploration  | CORT (stress)   | 0.183         | 0.218         |
| [19]*     | Brazilian guinea pig <i>Cavia aperea</i>                  | Exploration  | CORT (baseline) | -0.683        | 0.428         |
| [19]*     | Brazilian guinea pig <i>Cavia aperea</i>                  | Exploration  | CORT (stress)   | -0.152        | 0.247         |
| <b>d)</b> |                                                           |              |                 |               |               |
| [20]      | Human <i>Homo sapiens</i>                                 | Activity     | BMR             | 0.493         | 0.274         |
| [20]      | Human <i>Homo sapiens</i>                                 | Activity     | BMR             | 0.623         | 0.220         |
| [21]      | Eastern chipmunk <i>Tamias striatus</i>                   | Dociility    | RMR             | <b>-0.041</b> | -0.254,0.23   |
| [21]      | Eastern chipmunk <i>Tamias striatus</i>                   | Dociility    | DEE             | <b>-0.177</b> | -0.119,0.473  |
| [21]      | Eastern chipmunk <i>Tamias striatus</i>                   | Exploration  | RMR             | -0.143        | -0.447,0.136  |
| [21]      | Eastern chipmunk <i>Tamias striatus</i>                   | Exploration  | DEE             | -0.316        | -0.709,-0.026 |
| [22]      | Ouachita Dusky Salamander <i>Desmognathus brimleyorum</i> | Exploration  | SMR             | -0.600        | 0.270         |
| [22]      | Ouachita Dusky Salamander <i>Desmognathus brimleyorum</i> | Feeding rate | SMR             | 0.600         | 0.190         |
| [22]      | Ouachita Dusky Salamander <i>Desmognathus brimleyorum</i> | Exploration  | SMR             | -0.410        | 0.410         |
| [22]      | Ouachita Dusky Salamander <i>Desmognathus brimleyorum</i> | Feeding rate | SMR             | 0.250         | 0.330         |
| [23]      | Western Trilling Cricket <i>Gryllus integer</i>           | Boldness     | RMR             | <b>-0.318</b> | 0.085         |
| [23]      | Western Trilling Cricket <i>Gryllus integer</i>           | Exploration  | RMR             | <b>0.345</b>  | 0.082         |
| [5]       | House cricket <i>Acheta domesticus</i>                    | Exploration  | RMR             | 0.150         | -0.27,0.48    |
| [5]       | House cricket <i>Acheta domesticus</i>                    | Activity     | RMR             | 0.020         | -0.43,0.34    |
| [24]*     | Guppy <i>Poecilia reticulata</i>                          | Activity     | Peak MR         | -0.039        | 0.272         |
| [24]*     | Guppy <i>Poecilia reticulata</i>                          | Boldness     | Peak MR         | 0.276         | 0.238         |
| [24]*     | Guppy <i>Poecilia reticulata</i>                          | Voracity     | Peak MR         | 0.100         | 0.261         |
| [24]*     | Guppy <i>Poecilia reticulata</i>                          | Display      | Peak MR         | -0.474        | 0.228         |

|       |                                                |             |         |              |       |
|-------|------------------------------------------------|-------------|---------|--------------|-------|
| [24]* | Guppy <i>Poecilia reticulata</i>               | Chase       | Peak MR | 0.095        | 0.284 |
| [9]*  | Brazilian guinea pig <i>Cavia aperea</i>       | Boldness    | RMR     | <b>0.458</b> | 0.375 |
| [9]*  | Brazilian guinea pig <i>Cavia aperea</i>       | Exploration | RMR     | <b>0.260</b> | 0.292 |
| [9]*  | Brazilian guinea pig <i>Cavia aperea</i>       | Exploration | RMR     | 0.113        | 0.465 |
| [25]* | Yellow Mealworm Beetle <i>Tenebrio molitor</i> | Exploration | RMR     | 0.704        | 0.040 |
| [25]* | Yellow Mealworm Beetle <i>Tenebrio molitor</i> | Exploration | RMR     | <b>0.515</b> | 0.055 |
| [25]* | Yellow Mealworm Beetle <i>Tenebrio molitor</i> | Boldness    | RMR     | 0.649        | 0.050 |
| [25]* | Yellow Mealworm Beetle <i>Tenebrio molitor</i> | Boldness    | RMR     | <b>0.583</b> | 0.048 |

---

\* Data re-analyzed



**Supplementary Table 2.** Heterogeneity estimates (with standard errors in brackets) for our standard meta-analytical model either with phylogeny, species identity or study identity fitted as random effect.  $I^2$  represents the proportion of variance among effect sizes explained by a focal variance component after excluding the total sampling error variance

|            | $I^2$ Focal random effect | $I^2$ Residual | $I^2$ Total |
|------------|---------------------------|----------------|-------------|
| Phylogeny  | 0.65 (0.12)               | 0.21 (0.09)    | 0.86 (0.04) |
| Species ID | 0.56 (0.12)               | 0.27 (0.09)    | 0.83 (0.05) |
| Study ID   | 0.46 (0.12)               | 0.34 (0.10)    | 0.80 (0.04) |

**Supplementary Table 3.** Estimates (mode) of  $r$  (correlation coefficient),  $|r|$  (absolute magnitude of correlation coefficient) and  $|r|^2$  (squared absolute magnitude of correlation coefficient) between behaviour and the physiology for three standard models controlled either for phylogeny, species identity or study identity. We present here the point estimates (mode) with 95% Credible Intervals (in brackets) derived from standard multilevel meta-analytic models.

|            | $r$                   | $ r $                | $ r ^2$              |
|------------|-----------------------|----------------------|----------------------|
| Phylogeny  | 0.139 (-0.124; 0.425) | 0.268 (0.191; 0.458) | 0.073 (0.036; 0.201) |
| Species ID | 0.105 (-0.009; 0.228) | 0.245 (0.179; 0.335) | 0.060 (0.029; 0.108) |
| Study ID   | 0.101 (0.011; 0.184)  | 0.216 (0.168; 0.278) | 0.047 (0.028; 0.076) |

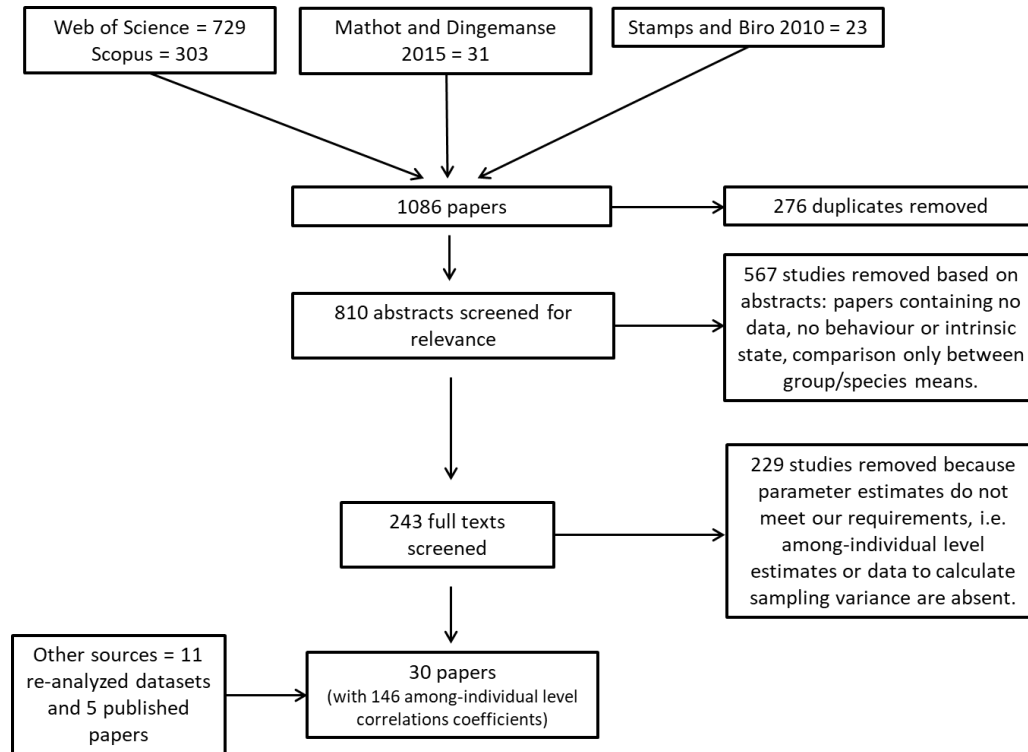

**Supplementary Figure 1.** PRISMA diagram summarizing our literature search.

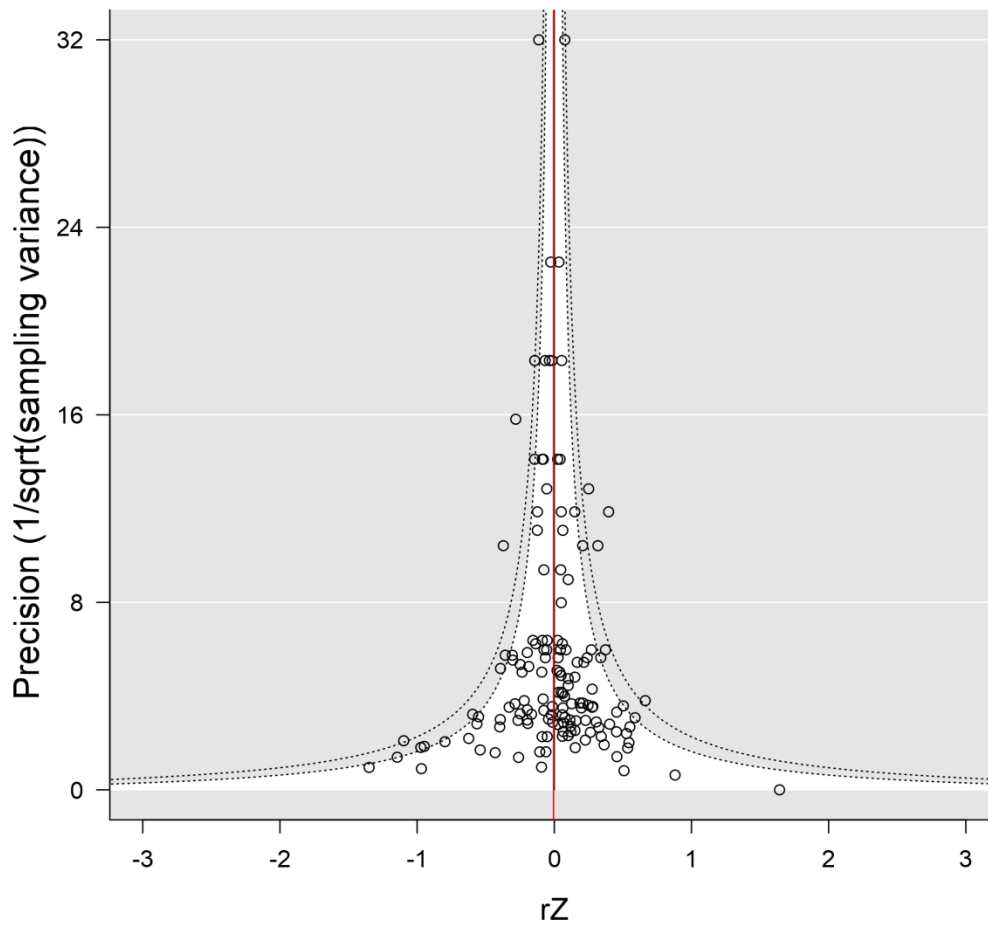

**Supplementary Figure 2.** Funnel plot of precision for z-transformed among-individual correlation coefficients ( $rZ$ ) between state and behavioural traits. Inner and outer dashed lines indicate pseudo-95% and 99% confidence intervals, respectively. The red vertical line indicates a zero effect.

## Supplementary Text S2: Within-individual correlations

### *Methodology*

From the 30 papers used to extract material for our analyses of among-individual level correlations (see Supplementary Figure 1), we also extracted a total of 49 within-individual correlations between behavior and internal state (listed in Supplementary Table 4). We used a standard meta-analytical model, identical to the one described in the main text, to retrieve meta-analytical estimates of  $r$ ,  $|r|$  and  $|r|^2$  at the within-individual level. Note, however, that for within-individual correlations the transformation of 95% credible intervals into standard errors was appropriately achieved using Eqn. S1 as it required information both on  $n$  (the number of individuals) and  $k$  (the average number of repeats per individuals):

$$SE = \frac{(\text{upper} - \text{lower CI})}{2t_{nk-3}} \quad \text{Eqn. S1}$$

We further used the same approach as described in the main text to estimate the presence of publication bias. Funnel plots of precision (Supplementary Figure 3) and Egger's regression ( $P = 0.751$ ) suggested a lack of publication bias, similar to our results for the among-individual correlation estimates (Main Text).

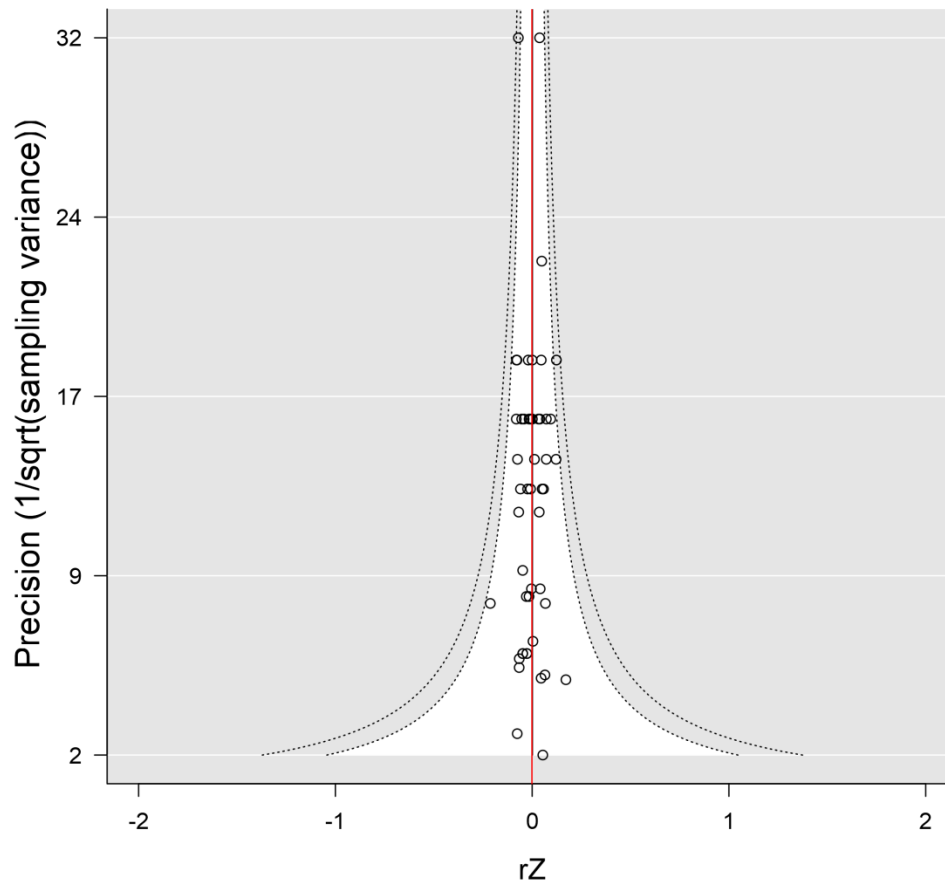

**Supplementary Figure 3.** Funnel plot of precision for z-transformed within-individual correlation coefficients ( $rZ$ ) between state and behavioural traits. Inner and outer dashed lines indicate pseudo-95% and 99% confidence intervals, respectively. The red vertical line indicates a zero effect.

### Results

The average within-individual correlation between state and behaviour did not differ from zero ( $r =$  [mean, 95 CI] 0.002, -0.032; 0.047). The absolute average correlation was positive and significant, but small ( $|r| = 0.060, 0.034; 0.86$ ) implying that variation in state does not represent an important factor explaining variation in behavioural expression within individuals. Indeed, within-individual variation in

state explained a near-zero proportion of the variation in behaviour within-individuals ( $|r|^2 = 0.003, 0.001; 0.007$ ).

**Supplementary Table 4.** Within-individual correlation estimates used in our meta-analysis, grouped by the type of intrinsic state variable (a) body mass, b) hormones and c) metabolic rate). For each estimate, we print an abbreviated reference to the study, the study species (English followed by Latin name), the type of behaviour assayed, the type of state variable (Moderator), the correlation coefficient, statistical error term. Correlation coefficients that were multiplied by -1 (see Main Text) are highlighted in bold-face. SMR = standard metabolic rate, RMR = resting metabolic rate, DEE = daily energy expenditure, CORT = corticosterone.

| Study                      | Species                                           | Behaviour        | Moderator | r      | Error (SE or 95%CI) |
|----------------------------|---------------------------------------------------|------------------|-----------|--------|---------------------|
| <b>a)</b>                  |                                                   |                  |           |        |                     |
| [1]                        | Southern field cricket <i>Gryllus bimaculatus</i> | Exploration      | Body mass | -0.110 | 0.060               |
| [1]                        | Southern field cricket <i>Gryllus bimaculatus</i> | Aggression       | Body mass | -0.070 | 0.060               |
| [1]                        | Southern field cricket <i>Gryllus bimaculatus</i> | Mating behaviour | Body mass | 0.010  | 0.060               |
| Han et al. Unpublished I   | Southern field cricket <i>Gryllus bimaculatus</i> | Aggression       | Body mass | 0.19   | 0.053               |
| Han et al. Unpublished I   | Southern field cricket <i>Gryllus bimaculatus</i> | Aggression       | Body mass | 0.054  | 0.060               |
| Han et al. Unpublished I   | Southern field cricket <i>Gryllus bimaculatus</i> | Exploration      | Body mass | 0.115  | 0.052               |
| Han et al. Unpublished I   | Southern field cricket <i>Gryllus bimaculatus</i> | Exploration      | Body mass | -0.01  | 0.057               |
| Han et al. Unpublished II  | Southern field cricket <i>Gryllus bimaculatus</i> | Aggression       | Body mass | 0.007  | 0.047               |
| Han et al. Unpublished II  | Southern field cricket <i>Gryllus bimaculatus</i> | Aggression       | Body mass | -0.119 | 0.056               |
| Han et al. Unpublished II  | Southern field cricket <i>Gryllus bimaculatus</i> | Exploration      | Body mass | -0.004 | 0.029               |
| Han et al. Unpublished II  | Southern field cricket <i>Gryllus bimaculatus</i> | Exploration      | Body mass | -0.111 | 0.033               |
| [2]                        | Canary <i>Serinus canaria</i>                     | Song repertoire  | Body mass | 0.110  | 0.060               |
| [2]                        | Canary <i>Serinus canaria</i>                     | Song activity    | Body mass | -0.060 | 0.360               |
| [2]                        | Canary <i>Serinus canaria</i>                     | Song consistency | Body mass | 0.070  | 0.530               |
| Moiron et al. Unpublished  | Great tit <i>Parus major</i>                      | Aggression       | Body mass | -0.01  | -0.12,0.1           |
| Moiron et al. Unpublished  | Great tit <i>Parus major</i>                      | Exploration      | Body mass | -0.03  | -0.13,0.07          |
| Niemela et al. Unpublished | Southern field cricket <i>Gryllus bimaculatus</i> | Exploration      | Body mass | 0.070  | 0.060               |
| [4]                        | House cricket <i>Acheta domesticus</i>            | Activity         | Body mass | -0.050 | -0.21,0.11          |
| [4]                        | House cricket <i>Acheta domesticus</i>            | Activity         | Body mass | 0.030  | -0.09,0.19          |

|           |                                                           |                          |                  |              |              |
|-----------|-----------------------------------------------------------|--------------------------|------------------|--------------|--------------|
| [4]       | House cricket <i>Acheta domesticus</i>                    | Response to predator cue | Body mass        | 0.010        | -0.15,0.16   |
| [4]       | House cricket <i>Acheta domesticus</i>                    | Response to predator cue | Body mass        | 0.090        | -0.04,0.23   |
| [5]       | House cricket <i>Acheta domesticus</i>                    | Activity                 | Body mass        | 0.05         | -0.14,0.17   |
| [5]       | House cricket <i>Acheta domesticus</i>                    | Exploration              | Body mass        | -0.060       | -0.08,0.22   |
| [10]      | European field cricket <i>Gryllus campestris</i>          | Aggression               | Body mass        | 0.05         | 0.06         |
| [10]      | European field cricket <i>Gryllus campestris</i>          | Exploration              | Body mass        | 0.13         | 0.06         |
| [10]      | European field cricket <i>Gryllus campestris</i>          | Activity                 | Body mass        | 0.06         | 0.06         |
| [8]       | Red Knot <i>Calidris canutus</i>                          | Exploration              | Body mass        | 0.13         | -0.35,0.44   |
| <b>b)</b> |                                                           |                          |                  |              |              |
| [15]      | Sheepshead swordtail <i>Xiphophorus birchmanni</i>        | Activity                 | CORT (stress)    | -0.026       | 0.116        |
| [15]      | Sheepshead swordtail <i>Xiphophorus birchmanni</i>        | Activity                 | Ketotestosterone | -0.052       | 0.116        |
| [16]      | Belding's ground squirrel <i>Urocitellus beldingi</i>     | Exploration              | CORT (stress)    | -0.065       | -0.185,0.063 |
| [16]      | Belding's ground squirrel <i>Urocitellus beldingi</i>     | Activity                 | CORT (stress)    | -0.035       | -0.191,0.104 |
| [16]      | Belding's ground squirrel <i>Urocitellus beldingi</i>     | Docility                 | CORT (stress)    | <b>0.046</b> | -0.146,0.159 |
| [17]      | Alpine marmot <i>Marmota marmota</i>                      | Activity                 | CORT (stress)    | 0.270        | -0.1,0.64    |
| [17]      | Alpine marmot <i>Marmota marmota</i>                      | Impulsivity              | CORT (stress)    | 0.150        | -0.19,0.58   |
| [17]      | Alpine marmot <i>Marmota marmota</i>                      | Docility                 | CORT (stress)    | <b>0.040</b> | -0.42,0.26   |
| [2]       | Canary <i>Serinus canaria</i>                             | Song repertoire          | Testosterone     | 0.020        | 0.150        |
| [2]       | Canary <i>Serinus canaria</i>                             | Song activity            | Testosterone     | 0.000        | 0.120        |
| [2]       | Canary <i>Serinus canaria</i>                             | Song consistency         | Testosterone     | -0.050       | 0.180        |
| [18]*     | House sparrow <i>Passer domesticus</i>                    | Activity                 | Testosterone     | -0.042       | 0.106        |
| [18]*     | House sparrow <i>Passer domesticus</i>                    | Exploration              | Testosterone     | 0.047        | 0.112        |
| <b>c)</b> |                                                           |                          |                  |              |              |
| [20]      | Human <i>Homo sapiens</i>                                 | Activity                 | BMR              | -0.324       | 0.111        |
| [20]      | Human <i>Homo sapiens</i>                                 | Activity                 | BMR              | -0.056       | 0.123        |
| [22]      | Ouachita Dusky Salamander <i>Desmognathus brimleyorum</i> | Exploration              | SMR              | -0.150       | 0.160        |
| [22]      | Ouachita Dusky Salamander <i>Desmognathus brimleyorum</i> | Feeding rate             | SMR              | -0.170       | 0.160        |
| [22]      | Ouachita Dusky Salamander <i>Desmognathus brimleyorum</i> | Exploration              | SMR              | -0.170       | 0.160        |
| [22]      | Ouachita Dusky Salamander <i>Desmognathus brimleyorum</i> | Feeding rate             | SMR              | -0.150       | 0.160        |
| [23]      | Western Trilling Cricket <i>Gryllus integer</i>           | Exploration              | RMR              | <b>0.079</b> | 0.083        |
| [25]*     | Yellow Mealworm Beetle <i>Tenebrio molitor</i>            | Exploration              | RMR              | -0.016       | 0.068        |



---

|       |                                                |             |     |       |       |
|-------|------------------------------------------------|-------------|-----|-------|-------|
| [25]* | Yellow Mealworm Beetle <i>Tenebrio molitor</i> | Exploration | RMR | 0.178 | 0.065 |
|-------|------------------------------------------------|-------------|-----|-------|-------|

\* Data re-analyzed

## References

1. Han CS, Jäger HY, Dingemanse NJ. 2016 Individuality in nutritional preferences: a multi-level approach in field crickets. *Sci. Rep.* **6**, 29071. (doi:10.1038/srep29071)
2. Iserbyt A, Eens M, Baetens W, Vermeulen A, Müller W. 2017 Within- and between-individual (co)variance partitioning reveals limited pleiotropic effects of testosterone on immune function, sexual signaling, and parental investment. *Behav. Ecol. Sociobiol.* **71**. (doi:10.1007/s00265-017-2308-2)
3. Kelleher SR, Silla AJ, Dingemanse NJ, Byrne PG. 2017 Body size predicts between-individual differences in exploration behaviour in the southern corroboree frog. *Anim. Behav.* **129**, 161–170. (doi:10.1016/j.anbehav.2017.05.013)
4. Royauté R, Dochtermann NA. 2017 When the mean no longer matters: Developmental diet affects behavioral variation but not population averages in the house cricket (*Acheta domesticus*). *Behav. Ecol.* **28**, 337–345. (doi:10.1093/beheco/arw164)
5. Royauté R, Greenlee K, Baldwin M, Dochtermann NA. 2015 Behaviour, metabolism and size: Phenotypic modularity or integration in *Acheta domesticus*? *Anim. Behav.* **110**, 163–169. (doi:10.1016/j.anbehav.2015.09.027)
6. Wilson AJ, de Boer M, Arnott G, Grimmer A. 2011 Integrating personality research and animal contest theory: Aggressiveness in the green swordtail *Xiphophorus helleri*. *PLoS One* **6**. (doi:10.1371/journal.pone.0028024)
7. Wilson AJ, Grimmer A, Rosenthal GG. 2013 Causes and consequences of contest outcome: Aggressiveness, dominance and growth in the sheepshead swordtail, *Xiphophorus birchmanni*. *Behav. Ecol. Sociobiol.* **67**, 1151–1161. (doi:10.1007/s00265-013-1540-7)
8. Bijleveld AI, Massourakis G, van der Marel A, Dekinga A, Spaans B, van Gils JA, Piersma T. 2014 Personality drives physiological adjustments and is not related to survival. *Proc. R. Soc. B Biol. Sci.* **281**, 20133135–20133135. (doi:10.1098/rspb.2013.3135)
9. Guenther A, Finkemeier MA, Trillmich F. 2014 The ontogeny of personality in the wild guinea pig. *Anim. Behav.* **90**, 131–139. (doi:10.1016/j.anbehav.2014.01.032)
10. Santostefano F, Wilson AJ, Araya-Ajoy YG, Dingemanse NJ. 2016 Interacting with the enemy: Indirect effects of personality on conspecific aggression in crickets. *Behav. Ecol.* **27**, 1235–1246. (doi:10.1093/beheco/arw037)
11. Kurvers RHJM, Eijkelenkamp B, van Oers K, van Lith B, van Wieren SE, Ydenberg RC, Prins HHT. 2009 Personality differences explain leadership in barnacle geese. *Anim. Behav.* **78**, 447–453. (doi:10.1016/j.anbehav.2009.06.002)
12. White SJ, Kells TJ, Wilson AJ. 2016 Metabolism, personality and pace of life in the Trinidadian guppy, *Poecilia reticulata*. *Behaviour* **153**, 1517–1543.
13. Kluehn E, Siitari H, Brommer JE. 2013 Testing for between individual correlations of personality

- and physiological traits in a wild bird. *Behav. Ecol. Sociobiol.* **68**, 205–213. (doi:10.1007/s00265-013-1635-1)
14. Santostefano F, Wilson AJ, Niemelä PT, Dingemanse NJ. 2017 Behavioural mediators of genetic life-history trade-offs in field crickets. *Proc. R. Soc. B Biol. Sci.* **284**, 20171567
  15. Boulton K, Couto E, Grimmer AJ, Earley RL, Canario AVM, Wilson AJ, Walling CA. 2015 How integrated are behavioral and endocrine stress response traits? A repeated measures approach to testing the stress-coping style model. *Ecol. Evol.* **5**, 618–633. (doi:10.1002/ece3.1395)
  16. Dosmann AJ, Brooks KC, Mateo JM. 2015 Within-Individual Correlations Reveal Link Between a Behavioral Syndrome, Condition, and Cortisol in Free-Ranging Belding's Ground Squirrels. *Ethology* **121**, 125–134. (doi:10.1111/eth.12320)
  17. Ferrari C, Pasquaretta C, Carere C, Cavallone E, von Hardenberg A, Réale D. 2013 Testing for the presence of coping styles in a wild mammal. *Anim. Behav.* **85**, 1385–1396. (doi:10.1016/j.anbehav.2013.03.030)
  18. Mutzel A, Kempenaers B, Laucht S, Dingemanse NJ, Dale J. 2011 Circulating testosterone levels do not affect exploration in house sparrows: Observational and experimental tests. *Anim. Behav.* **81**, 731–739. (doi:10.1016/j.anbehav.2011.01.001)
  19. Guenther A, Trillmich F. 2013 Photoperiod influences the behavioral and physiological phenotype during ontogeny. *Behav. Ecol.* **24**, 402–411. (doi:10.1093/beheco/ars177)
  20. Careau V. 2017 Energy Intake, Basal Metabolic Rate, and Within-Individual Trade-Offs in Men and Women Training for a Half Marathon: A Reanalysis. *Physiol. Biochem. Zool.* **90**, 392–398. (doi:10.1086/691338)
  21. Careau V, Montiglio PO, Garant D, Pelletier F, Speakman JR, Humphries MM, Réale D. 2015 Energy expenditure and personality in wild chipmunks. *Behav. Ecol. Sociobiol.* **69**, 653–661. (doi:10.1007/s00265-015-1876-2)
  22. Gifford ME, Clay TA, Careau V. 2014 Individual (Co)variation in Standard Metabolic Rate, Feeding Rate, and Exploratory Behavior in Wild-Caught Semiaquatic Salamanders. *Physiol. Biochem. Zool.* **87**, 384–396. (doi:10.1086/675974)
  23. Krams IA *et al.* 2017 Metabolic rate associates with, but does not generate covariation between, behaviours in western stutter-trilling crickets, *Gryllus integer*. *Proc. R. Soc. B Biol. Sci.* **284**, 20162481. (doi:10.1098/rspb.2016.2481)
  24. Biro PA, Fanson K V., Santostefano F. 2016 Stress-induced peak (but not resting) metabolism correlates with mating display intensity in male guppies. *Ecol. Evol.* **6**, 6537–6545. (doi:10.1002/ece3.2373)
  25. Krams I, Kivleniece I, Kuusik A, Krama T, Mänd R, Rantala MJ, Znotiņa S, Freeberg TM, Mänd M. 2013 Predation promotes survival of beetles with lower resting metabolic rates. *Entomol. Exp. Appl.* **148**, 94–103. (doi:10.1111/eea.12079)
